# Supplementary material
Source: ML conference proceedings conference paper supplement (https://openaccess.thecvf.com/content/CVPR2025/html/Liu_See_Further_When_CVPR_2025_paper.html)
Supplement: Supplementary file 1 [file Liu_See_Further_When_CVPR_2025_supplemental.pdf]

# See Further When Clear: Curriculum Consistency Model

## Supplementary Material

### 6. More Samples

Here we provide more samples in Figure 10-Figure 12.

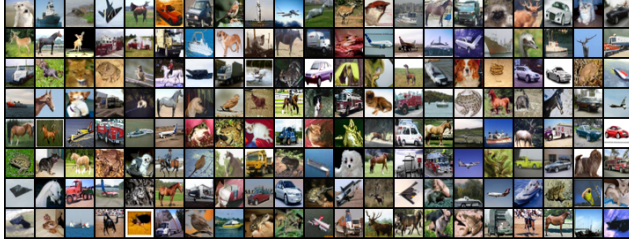

Figure 10. Samples generated by CCM (NFE=1) trained on CIFAR-10.

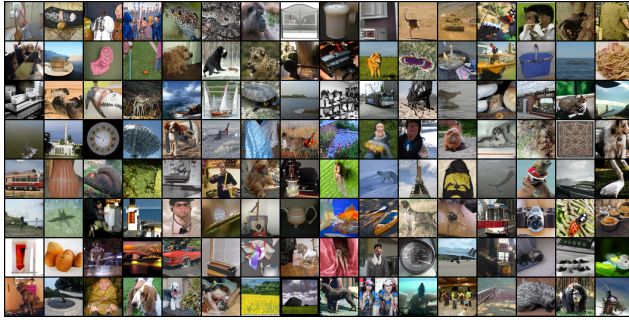

Figure 11. Samples generated by CCM (NFE=1) trained on ImageNet 64x64 according to random classes.

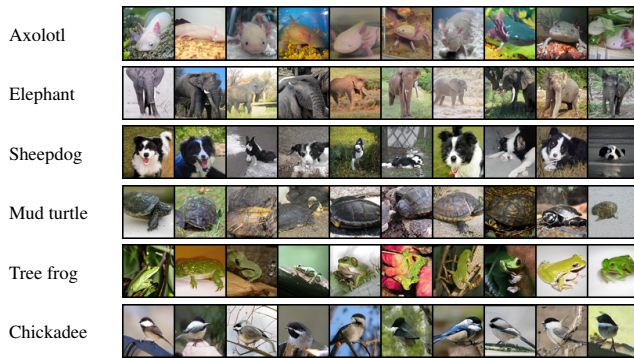

Figure 12. Samples generated by CCM (NFE=1) trained on ImageNet 64x64 according to specified classes.

are listed in Table 5.

Table 5. Experimental details on hyperparameters.

| Hyperparameter              | CIFAR-10 32x32 | ImageNet 64x64 | CC3M 1024x1024 |
|-----------------------------|----------------|----------------|----------------|
| Training type               | unconditional  | conditional    | conditional    |
| Learning rate               | 2e-4           | 1e-5           | 5e-6           |
| Discriminator learning rate | 0.002          | 0.002          | 1e-5           |
| target EMA decay rate $\mu$ | 0.9            | 0.9            | -              |
| student EMA decay rate      | 0.9999         | 0.9999         | 0.99           |
| N                           | 1              | 1              | 1              |
| ODE solver                  | Euler          | Euler          | Euler          |
| Batch size                  | 128            | 2048           | 2              |
| Number of GPUs              | 1              | 8              | 1              |
| Training iterations         | 300K           | 500K           | 20K            |
| $T_{\text{KDC}}$            | 60             | 60             | 60             |

### 7. Experimental Hyperparameters

We minimally change the OT-CFM’s [39] design to comply the previous implementation, and important modifications
